# Supplementary material for: An active ferrocenyl triarylphosphine for palladium-catalyzed Suzuki–Miyaura cross-coupling of aryl halides
Source: Royal Society of Chemistry journal article supplement (doi:10.1039/b407661c), 2004-01-01
Supplement: b407661c.doc [file b407661c.doc]

# Supplementary Information

An Active Ferrocenyl Tri*aryl*phosphine for Palladium-Catalyzed Suzuki-Miyaura Cross-Coupling of Aryl Halides

Fuk Yee Kwong,*a Kin Shing Chan,b Chi Hung Yeung,*a and Albert S. C. Chan*a

aOpen Laboratory of Chirotechnology of the Institute of Molecular Technology for Drug Discovery and Synthesis,*[[1]](#footnote-2)* Department of Applied Biology and Chemical Technology, The Hong Kong Polytechnic University, Hung Hom, Hong Kong

bDepartment of Chemistry, The Chinese University of Hong Kong, Shatin, New Territories, Hong Kong

Table of Contents

| 1. General considerations………………………………………………………………………..… | S2 |
| --- | --- |
| 2. Procedures for the preparation of ferrocenyl triarylphosphine ligand……………….….. | S3 |
| 3. Procedures for the preparation of the aryl bromide and chloride substrates…………… | S5 |
| 4. General procedures for triarylphosphine ligands screening……………………………….. | S7 |
| 5. General procedures for Suzuki-Miyaura couplings of aryl bromides and chlorides….… | S8 |
| 6. Characterization data for coupling products……………………………………………….… | S8 |
| 7. References…………………………………………………………………………………………. | S16 |

**1. General considerations.**

Unless otherwise noted, all reagents were purchased from commercial suppliers and used without purification. All Suzuki-Miyaura reactions were performed in resealable Rotaflo® (England) Teflon screw cap Schlenk flask. Toluene and tetrahydrofuran (THF) were distilled from sodium and sodium benzophenone ketyl, respectively.[[2]](#endnote-2) Chlorodiphenylphosphine was distilled under vacuum prior to use. Thin layer chromatography was performed on Merck precoated silica gel 60 F254 plates. Silica gel (Merck, 70-230 and 230-400 mesh) was used for column chromatography. Melting points were recorded on Büchi Melting Point B-545 instrument (uncorrected). 1H NMR spectra were recorded on a Varian (500 MHz) spectrometer. Spectra were referenced internally to the residual proton resonance in CDCl3 ( 7.26 ppm), or with tetramethylsilane (TMS,  0.00 ppm) as the internal standard. Chemical shifts () were reported as part per million (ppm) in  scale downfield from TMS. 13C NMR spectra were recorded on a Varian 500 spectrometer and referenced to CDCl3 ( 77.00 ppm). 31P NMR spectra were recorded on a Varian spectrometer and referenced to 85% H3PO4 externally. Coupling constants (*J*) were reported in Hertz (Hz). Mass spectra (EIMS and FABMS) were recorded on a HP 5989B Mass Spectrometer. High-resolution mass spectra (HRMS) were obtained on a Brüker APEX 47e FT-ICR mass spectrometer (ESIMS). GC-MS analysis was conducted on a HP G1800C GCD system using a HP5MS column (30 m x 0.25 mm). The products described in GC yield were accorded to the authentic samples/dodecane calibration curve.

**2. Procedures for the preparation of ferrocenyl triarylphosphine ligand:**

**2-Bromophenylferrocene.** Ferrocene (3.7 g, 20 mmol) was charged into a 3-necked round bottom flask equipped with addition funnel. Freshly distilled THF (60 mL) was added to the reaction flask via rubber septum under nitrogen atmosphere at room temperature. t-BuLi (11.8 mL, 20 mmol, 1.7 M in hexane) was added dropwise at 0 °C and the reaction mixture was stirred for one hour. ZnCl2 solution (44 mL, 22 mmol, 0.5 M in THF) was then added. After the solution was stirred for one hour at 0 °C, the whole reaction mixture was warmed to room temperature. Pd(PPh3)4 (693 mg, 0.6 mmol, 3 mol%) and ortho-bromoiodobenzene (6.23 g, 22 mmol) was then added counter-flow with nitrogen and the reaction was heated to 50 °C for 4 hours. After the completion of reaction (judged by tlc and GC), the reaction was allowed to reach room temperature. Saturated NH4Cl (~50 mL) was slowly added. The organic layer was washed with water (2 × ~100 mL), brine (1 × ~100 mL) and dried over Na2SO4. The solvent was removed under rotary evaporation and the brown crude mixture was purified by column chromatography on silica gel using hexane as eluent to afford 2-bromophenylferrocene (3.2 g, 47% yield) as orange viscous liquid. Rf = 0.3 (hexane); 1H NMR (500 MHz, CDCl3)  7.75 (dt, 1 H, J = 1.5 Hz, 7.5 Hz), 7.54 (dt, 1 H, J = 1.5 Hz, 7.5 Hz), 7.26-7.30 (m, 1 H), 7.06-7.09 (m, 1 H), 4.73 (s, 2 H), 4.34 (s, 2 H), 4.16 (s, 5 H); 13C NMR (500 MHz, CDCl3)  139.2, 133.8, 132.4, 127.7, 127.1, 122.8, 86.6, 70.5, 69.9, 68.4; HRMS(ESI): Calcd. for C16H13BrFe 399.9550, found: 399.9519.

**2-(Diphenylphosphino)phenylferrocene (7).** 2-Bromophenylferrocene (800 mg, 2.4 mmol) was charged in a 2-necked round bottom flask followed by the addition of freshly distilled THF (10 mL) under nitrogen at room temperature. The reaction was cooled to –78 °C using acetone/dry ice bath. n-BuLi (1.6 mL, 2.6 mmol, 1.6 M in hexane) was then added dropwise and the solution was stirred at –78 °C for 1 hour. Distilled chlorodiphenylphosphine (506 L, 2.8 mmol) was added in dropwise manner using micro-syringe at –78 °C. After complete addition, the reaction mixture was slowly warmed to room temperature and stirred overnight. Saturated NH4Cl (~20 mL) was slowly added. The organic layer was washed with water (2 × ~50 mL), brine (1 × ~50 mL) and dried over Na2SO4. The solvent was removed under rotary evaporation and the deep-orange crude mixture was purified by column chromatography on silica gel using solvent gradient (hexane to 10% ethyl acetate in hexane) as eluent to obtain 2-(diphenylphosphino)phenylferrocene (930 mg, 89% yield) as orange solid. Rf = 0.4 (10% ethyl acetate in hexane); Melting point: 116-117 °C; 1H NMR (500 MHz, CDCl3)  7.95 (dd, 1 H, J = 4.5 Hz), 7.29-7.37 (m, 7 H), 7.20-7.25 (m, 4 H), 7.11 (t, 1 H, J = 7.5 Hz), 6.85 (dd, 1 H, J = 4.0 Hz), 4.44 (d, 2 H, J = 1.5 Hz), 4.20 (t, 1 H, J = 2.0 Hz), 4.08 (s, 5 H); 13C NMR (500 MHz, CDCl3)  144.2 (d, JCP = 21.2 Hz), 137.9 (d, JCP = 12.1 Hz), 135.4 (d, JCP = 17.7 Hz), 133.9, 133.8 (d, JCP = 19.8 Hz), 131.3 (d, JCP = 5.3 Hz), 128.3 (d, JCP = 8.3 Hz), 128.2 (d, JCP = 19.8 Hz), 126.2, 87.7 (d, JCP = 7.7 Hz), 71.1, 71.0, 69.4, 68.0; 31P NMR (202 MHz, CDCl3)  -12.3; HRMS(ESI): Calcd. for C28H24PFe 477.0965, found: 477.0923.

**3. Procedures for the preparation of the aryl bromide and chloride substrates**

**2-Bromo-3,5-di-tert-butylphenol.***[[3]](#endnote-3)* 3,5-Di-tert-butylphenol (6.0 g, 29 mmol) was dissolved in CS2 (50 mL) at 0˚C, then bromine (1.5 mL, 29 mmol) in CS2 (10 mL) was added dropwisely at the same temperature. The resulting brownish-red solution was stirred for 1 hour at room temperature. Saturated Na2S2O3 solution (~40 mL) was added and the solution was stirred for 30 minutes. The organic layer was separated and the aqueous layer was extracted with dichloromethane (~100 mL  2), the combined organic phase was washed with water (~100 mL  2), brine (~100 mL  1) and dried over Na2SO4. The solvent was removed by rotary evaporation and the light yellow residue was crystallized at 0˚C in minimal amount of hexane to give 2-bromo-3,5-di-tert-butylphenolas colorless crystal (8.1 g, 98%). Rf = 0.4 (hexane/ethyl acetate = 20 : 1); 1H NMR (500 MHz, CDCl3)  1.30 (s, 9 H), 1.51 (s, 9 H), 5.92 (s, 1 H), 6.97 (d, 1 H, J = 1.9 Hz), 7.04 (d, 1 H, J = 1.8 Hz); MS (EI): m/z (relative intensity) 286 (M+, 100), 284 (M+, 100), 256 (20), 254 (20).

**2-Bromo-3,5-di-tert-butylanisole.Error: Reference source not found** To a solution of sodium hydroxide (1.1 g, 27.5 mmol) in water (20 mL) was added to 2-bromo-3,5-di-tert-butylphenol (4.2 g, 14.7 mmol) in dichloromethane (100 mL). The phase transfer catalyst tetra-n-butylammonium bromide (0.47 g, 1.46 mmol) was then added. Dimethylsulfate (2.7 mL, 29 mmol) was added and the reaction mixture was allowed to stir at room temperature for 30 min. The reaction mixture was extracted by dichloromethane (50 mL x 3). The combined organic phase was washed with brine and dried over Na2SO4. After removal of solvent, the residue was distilled under reduced pressure (88-90˚C / 0.02 mmHg) to give 2-bromo-3,5-di-tert-butylanisole (7.4 g, 90% yield) as a colorless liquid which crystallized as colorless crystal upon standing for several minutes. Rf = 0.4 (hexane); 1H NMR (500 MHz, CDCl3)  1.32 (s, 9 H), 1.54 (s, 9 H), 3.89 (s, 3 H), 6.83 (d, 1 H, J = 1.9 Hz), 7.12 (d, 1 H, J = 1.9 Hz); MS (EI): m/z (relative intensity) 299 (M+, 43), 297 (40), 284 (60), 282 (54), 254 (13).

**4. General procedures for triarylphosphine ligands screening**

Equation 1: Pd2dba3 (2.3 mg, 0.25 mol%), triarylphosphine (0.6 mol%), 1-bromo-2,5-dimethoxybenzene (217 mg, 1.0 mmol), phenylboronic acid (183 mg, 1.5 mmol) and anhydrous KF (174 mg, 3.0 mmol) were charged into an array of Teflon screw-capped Schlenk flasks. The flasks were evacuated and backfilled with nitrogen (3 cycles). Anhydrous THF (2 mL) was then added and the Schlenk flasks were resealed. The reactions were stirred at room temperature (25-26 C) for 24 hours. Dodecane (227 L, 1 mmol, internal standard) was then added with stirring. A sample aliquot was taken out from each reaction and subjected to GC analysis. Note: The GC yields was prior calibrated with authentic samples/dodecane calibration curve.

Equation 2: Pd2dba3 (4.6 mg, 0.5 mol%), triarylphosphine (1.2 mol%), 3-chlorobenzonitrile (138 mg, 1.0 mmol), phenylboronic acid (183 mg, 1.5 mmol) and K3PO4H2O (692 mg, 3.0 mmol) were charged into an array of Teflon screw-capped Schlenk flasks. The flasks were evacuated and backfilled with nitrogen (3 cycles). Distilled toluene (2 mL) was then added and the Schlenk flasks were resealed. The reactions were stirred at 90 C for 24 hours. Dodecane (227 L, 1 mmol, internal standard) was then added with stirring. A sample aliquot was taken out from each reaction and subjected to GC analysis. Note: The GC yields was prior calibrated with authentic samples/dodecane calibration curve.

**5. General procedures for Suzuki-Miyaura couplings of aryl chlorides**

Pd2dba3 (4.6 mg, 0.5 mol%), 2-(diphenylphosphino)phenylferrocene (5.3 mg, 1.2 mol%), arylchoride or bromide (1.0 mmol, if solid), arylboronic acid (183 mg, 1.5 mmol) and base (3.0 mmol) were charged into a Teflon screw-capped Schlenk flask. The flask was evacuated and backfilled with nitrogen (3 cycles). Aryl chloride or bromide (1 mmol, if liquid) and distilled solvent (toluene or THF, 2 mL) were added and the Schlenk flask was resealed. The reaction was stirred at specified temperature (Table 1-4). The reaction was then allowed to reach room temperature and the crude product was purified by flash column chromatography on silica gel using hexane/ethyl acetate as eluent to afford the desired product.

**6. Characterization data for coupling products**

**2,5-Dimethoxybiphenyl (Table 2, entry 1).***[[4]](#endnote-4)*General procedures for Suzuki-Miyaura coupling were followed. 1-Bromo-2,5-dimethoxybenzene (215 mg, 1.0 mmol), phenylboronic acid (183 mg, 1.5 mmol), KF (174 mg, 3.0 mmol), Pd2dba3 (4.6 mg, 0.5 mol%), 2-(diphenylphosphino)phenylferrocene (5.3 mg, 1.2 mol%) and THF (2 mL) were used to obtain 2,5-dimethoxybiphenyl (207 mg, 98% yield) as white solid. 1H NMR (500 MHz, CDCl3)  7.54-7.56 (m, 2 H), 7.41-7.44 (m, 2 H), 7.35-7.41 (m, 1 H), 6.93-6.95 (m, 2 H), 6.87 (dd, 1 H, J = 3.0 Hz, 9.0 Hz), 3.82 (s, 3 H), 3.77 (s, 3 H); 13C NMR (125 MHz, CDCl3)  153.7, 150.7, 138.4, 131.7, 129.4, 128.0, 127.0, 116.7, 113.0, 112.6, 56.3, 55.8; MS(EI): m/z (relative intensity) 214 (M+, 100).

**2-Phenylbiphenyl (Table 2, entry 2).***[[5]](#endnote-5)*General procedures for Suzuki-Miyaura coupling were followed. 2-Bromobiphenyl (232 mg, 1.0 mmol), phenylboronic acid (183 mg, 1.5 mmol), KF (174 mg, 3.0 mmol), Pd2dba3 (4.6 mg, 0.5 mol%), 2-(diphenylphosphino)phenylferrocene (5.3 mg, 1.2 mol%) and THF (2 mL) were used to obtain 2-phenylbiphenyl (219 mg, 96% yield) as white crystalline solid. 1H NMR (500 MHz, CDCl3)  7.45-7.49 (m, 4 H), 7.23-7.26 (m, 6 H), 7.19-7.21 (m, 4 H); 13C NMR (125 MHz, CDCl3)  141.5, 140.5, 130.6, 129.9, 127.8, 127.4, 126.4; MS(EI): m/z (relative intensity) 230 (M+, 100).

**2-Phenylbenzonitrile (Table 2, entry 3).***[[6]](#endnote-6)*General procedures for Suzuki-Miyaura coupling were followed. 2-Bromobenzonitrile (182 mg, 1.0 mmol), phenylboronic acid (183 mg, 1.5 mmol), KF (174 mg, 3.0 mmol), Pd2dba3 (4.6 mg, 0.5 mol%), 2-(diphenylphosphino)phenylferrocene (5.3 mg, 1.2 mol%) and THF (2 mL) were used to obtain 2-phenylbenzonitrile (170 mg, 95% yield) as colorless liquid. 1H NMR (500 MHz, CDCl3)  7.77 (dd, 1 H, J = 1.0 Hz, 8.0 Hz), 7.65 (ddd, 1 H, J = 1.5 Hz, 8.0 Hz, 8.0 Hz), 7.42-7.59 (m, 7 H); 13C NMR (125 MHz, CDCl3)  145.7, 138.3, 133.8, 133.0, 130.3, 128.7, 127.7, 118.9, 111.4; MS(EI): m/z (relative intensity) 179 (M+, 100).

**2,4,6-Triisopropylbiphenyl (Table 2, entry 4).** General procedures for Suzuki-Miyaura coupling were followed. 1-Bromo-2,4,6-triisopropylbenzene (283 mg, 1.0 mmol), phenylboronic acid (183 mg, 1.5 mmol), KF (174 mg, 3.0 mmol), Pd2dba3 (4.6 mg, 0.5 mol%), 2-(diphenylphosphino)phenylferrocene (5.3 mg, 1.2 mol%) and THF (2 mL) were heated to 30-32 C in 72 h to obtain 2,4,6-triisopropylbiphenyl (252 mg, 93% yield) as white solid. Melting point: 121-122 °C; 1H NMR (500 MHz, CDCl3)  7.34-7.41 (m, 3 H), 7.18-7.20 (m, 2 H), 7.07 (s, 2 H), 2.95 (hept, 1 H, J = 7.0 Hz), 2.61 (hept, 2 H, J = 7.0 Hz), 1.32 (d, 6 H, J = 8.0 Hz), 1.08 (d, 12 H, J = 8.0 Hz); 13C NMR (125 MHz, CDCl3)  147.8, 146.4, 140.8, 137.0, 129.8, 127.8, 126.3, 120.5, 34.2, 30.2, 24.2, 24.1; MS(EI): m/z (relative intensity) 280 (M+, 100); HRMS(ESI): Calcd. for C21H28 280.2191, found: 280.2184.

**2-Phenyl-3,5-di-tert-butylanisole (Table 2, entry 5).** General procedures for Suzuki-Miyaura coupling were followed. 2-Bromo-3,5-di-tert-butylanisole(299 mg, 1.0 mmol), phenylboronic acid (183 mg, 1.5 mmol), KF (174 mg, 3.0 mmol), Pd2dba3 (4.6 mg, 0.5 mol%), 2-(diphenylphosphino)phenylferrocene (5.3 mg, 1.2 mol%) and THF (2 mL) were heated to 30-32 C in 72 h to obtain 2-phenyl-3,5-di-tert-butylanisole(258 mg, 87% yield) as white solid. Melting point: 63-64 °C; 1H NMR (500 MHz, CDCl3)  7.31-7.37 (m, 3 H), 7.22-7.24 (m, 3 H), 6.87 (d, 1 H, J = 2.0 Hz), 3.64 (s, 3 H), 1.39 (s, 9 H), 1.16 (s, 9 H); 13C NMR (125 MHz, CDCl3)  157.6, 150.5, 139.9, 131.4, 128.3, 127.1, 126.3. 116.3, 106.3, 56.2, 37.0, 35.1, 32.7, 31.5; MS(EI): m/z (relative intensity) 296 (M+, 100); HRMS(ESI): Calcd. for C21H28O 296.2140, found: 296.2153.

**2-(4-tert-Butylphenyl)toluene (Table 2, entry 6).***[[7]](#endnote-7)*General procedures for Suzuki-Miyaura coupling were followed. 4-tert-Butylbromobenzene (213 mg, 1.0 mmol), ortho-tolylboronic acid (204 mg, 1.5 mmol), KF (174 mg, 3.0 mmol), Pd2dba3 (4.6 mg, 0.5 mol%), 2-(diphenylphosphino)phenylferrocene (5.3 mg, 1.2 mol%) and THF (2 mL) were used to obtain 2-(4-tert-butylphenyl)toluene (202 mg, 90% yield) as colorless oil. 1H NMR (500 MHz, CDCl3)  7.42 (d, 2 H, J = 8.0 Hz), 7.22-7.28 (m, 6 H), 2.29 (s, 3 H), 1.37 (s, 9 H); 13C NMR (125 MHz, CDCl3)  149.5, 141.9, 139.0, 135.4, 130.3, 129.9, 128.8, 127.1, 125.7, 124.9, 34.5, 31.4, 20.5; MS(EI): m/z (relative intensity) 224 (M+, 100).

**2-(2-Tolyl)benzaldehyde (Table 3, entry 1).***[[8]](#endnote-8)*General procedures for Suzuki-Miyaura coupling were followed. 2-Chlorobenzaldehyde (141 mg, 1.0 mmol), ortho-tolylboronic acid (204 mg, 1.5 mmol), K3PO4H2O (692 mg, 3.0 mmol), Pd2dba3 (4.6 mg, 0.5 mol%), 2-(diphenylphosphino)phenylferrocene (5.3 mg, 1.2 mol%) and toluene (2 mL) were used to obtain 2-(2-tolyl)benzaldehyde (176 mg, 90% yield) as yellow oil. 1H NMR (500 MHz, CDCl3)  9.74 (s, 1 H), 8.02 (dd, 1 H, J = 7.5 Hz, 2.0 Hz), 7.64 (m, 1 H), 7.50 (t, 1 H, J = 7.0 Hz), 7.24-7.36 (m, 4 H), 7.18 (d, 1 H, J = 7.0 Hz), 2.10 (s, 3 H); MS(EI): m/z (relative intensity) 196 (M+, 100).

**4-(2-Tolyl)benzaldehyde (Table 3, entry 2).Error: Reference source not found** General procedures for Suzuki-Miyaura coupling were followed. 4-Chlorobenzaldehyde (141 mg, 1.0 mmol), ortho-tolylboronic acid (204 mg, 1.5 mmol), K3PO4H2O (692 mg, 3.0 mmol), Pd2dba3 (4.6 mg, 0.5 mol%), 2-(diphenylphosphino)phenylferrocene (5.3 mg, 1.2 mol%) and toluene (2 mL) were used to obtain 4-(2-tolyl)benzaldehyde (178 mg, 91% yield) as white solid.  1H NMR (500 MHz, CDCl3)  9.92 (s, 1 H), 7.82 (d, 2 H, J = 8.0 Hz), 7.41 (d, 2 H, J = 8.0 Hz), 7.13-7.24 (m, 4 H), 2.19 (s, 3 H); 13C NMR (125 MHz, CDCl3)  191.9, 148.3, 140.5, 135.1, 134.8, 130.6, 129.9, 129.6, 129.4, 128.0, 125.9, 20.3; MS(EI): m/z (relative intensity) 196 (M+, 80), 165 (100).

**4-Phenylacetophenone (Table 3, entries 3 and 4).***[[9]](#endnote-9)* General procedures for Suzuki-Miyaura coupling were followed. 4-Chloroacetophenone (155 mg, 1.0 mmol), phenylboronic acid (183 mg, 1.5 mmol), K3PO4H2O (692 mg, 3.0 mmol), Pd2dba3 (4.6 mg, 0.5 mol%), 2-(diphenylphosphino)phenylferrocene (5.3 mg, 1.2 mol%) and toluene (2 mL) heated to 70 C for 24 h to obtain 4-phenylacetophenone(184 mg, 94% yield), or 4-chloroacetophenone (155 mg, 1 mmol), phenylboronic acid (183 mg, 1.5 mmol), K3PO4H2O (692 mg, 3 mmol), Pd2dba3 (18.3 mg, 2 mol%), 2-(diphenylphosphino)phenylferrocene (17.8 mg, 4 mol%) and toluene (2 mL) were stirred at room temperature for 48 h to obtain 4-phenylacetophenone (178 mg, 91% yield) as white solid. 1H NMR (500 MHz, CDCl3)  8.03 (d, 2 H, J = 8.5 Hz), 7.60-7.70 (m, 4 H), 7.39-7.48 (m, 3 H), 2.62 (s, 3 H); 13C NMR (125 MHz, CDCl3)  197.5, 145.8, 139.9, 136.1, 128.9, 128.8, 128.1, 127.2, 127.1, 26.3; MS(EI): m/z (relative intensity) 196 (M+, 100).

**Methyl 4-(4-methoxyphenyl)benzoate (Table 3, entry 5).***[[10]](#endnote-10)* General procedures for Suzuki-Miyaura coupling were followed. Methyl 4-chlorobenzoate (170 mg, 1.0 mmol), 4-methoxyphenylboronic acid (226 mg, 1.5 mmol), K3PO4H2O (692 mg, 3.0 mmol), Pd2dba3 (4.6 mg, 0.5 mol%), 2-(diphenylphosphino)phenylferrocene (5.3 mg, 1.2 mol%) and toluene (2 mL) were used to obtain methyl 4-(4-methoxyphenyl)benzoate (220 mg, 92% yield) as white solid. 1H NMR (500 MHz, CDCl3)  8.09 (d, 2 H, J = 8.5 Hz), 7.63 (d, 2 H, J = 8.5 Hz), 7.59 (d, 2 H, J = 9.0 Hz), 7.01 (d, 2 H, J = 9.0 Hz), 3.98 (s, 3 H), 3.87 (s, 3 H); 13C NMR (125 MHz, CDCl3)  167.0, 159.8, 145.1, 132.2, 130.1, 128.3, 128.2, 126.4, 114.5, 55.6, 52.4; MS(EI): m/z 242 (M+, 40), 211 (100); MS(EI): m/z (relative intensity) 242 (M+, 100).

**4-(2-Methoxyphenyl)toluene (Table 3, entry 6).***[[11]](#endnote-11)*General procedures for Suzuki-Miyaura coupling were followed. 4-Chlorotoluene (127 mg, 1.0 mmol), ortho-methoxyphenylboronic acid (226 mg, 1.5 mmol), K3PO4H2O (692 mg, 3.0 mmol), Pd2dba3 (18.3 mg, 2 mol%), 2-(diphenylphosphino)phenylferrocene (35.6 mg, 8 mol%) and toluene (2 mL) were heated to 110 C for 28 h to obtain methyl 4-(2-methoxyphenyl)toluene (183 mg, 93% yield) as colorless oil. 1H NMR (500 MHz, CDCl3)  7.43 (d, 1 H, J = 8.5 Hz), 6.94-7.31 (m, 7 H), 3.81 (s, 3 H), 2.39 (s, 3 H); 13C NMR (125 MHz, CDCl3)  156.4, 136.6, 135.5, 130.8, 130.6, 129.4, 128.7, 128.3, 120.7, 111.0, 55.6, 21.0; MS(EI): m/z (relative intensity) 198 (M+, 100).

**3-Cyanobiphenyl (Table 3, entry 7).***[[12]](#endnote-12)*General procedures for Suzuki-Miyaura coupling were followed. 3-Chlorobenzonitrile (138 mg, 1.0 mmol), phenylboronic acid (183 mg, 1.5 mmol), K3PO4H2O (692 mg, 3.0 mmol), Pd2dba3 (4.6 mg, 0.5 mol%), 2-(diphenylphosphino)phenylferrocene (5.3 mg, 1.2 mol%) and toluene (2 mL) were heated to 90 C for 24 h to obtain 3-cyanobiphenyl (172 mg, 96% yield) as light yellow solid. 1H NMR (500 MHz, CDCl3)  7.77 (dd, 1 H, J = 1.0 Hz, 8.0 Hz), 7.65 (m, 1 H), 7.42-7.59 (m, 7 H); 13C NMR (125 MHz, CDCl3)  145.8, 138.4, 133.6, 133.2, 130.3, 128.7, 127.9, 118.6, 111.1; MS(EI): m/z (relative intensity) 179 (M+, 100).

**3-(3-Trifluoromethylphenyl)pyridine (Table 3, entry 8).***[[13]](#endnote-13)*General procedures for Suzuki-Miyaura coupling were followed. 3-Chloropyridine (114 mg, 1.0 mmol), 3-trifluoromethylphenylboronic acid (285 mg, 1.5 mmol), K3PO4H2O (692 mg, 3.0 mmol), Pd2dba3 (4.6 mg, 0.5 mol%), 2-(diphenylphosphino)phenylferrocene (5.3 mg, 1.2 mol%) and toluene (2 mL) were heated to 110 C for 24 h to obtain 3-(3-trifluoromethylphenyl)pyridine (203 mg, 91% yield) as colorless oil. 1H NMR (500 MHz, CDCl3)  8.86 (d, 1 H, J = 3.0 Hz), 8.64 (dd, 1 H, J = 2.0 Hz, 5.0 Hz), 7.75-7.90 (m, 3 H), 7.54-7.63 (m, 2 H), 7.38-7.43 (m, 1 H); MS(EI): m/z (relative intensity) 223 (M+, 40), 204 (100).

**1-(1-Cyclopentene-1-yl)benzene (Table 3, entry 9).***[[14]](#endnote-14)* General procedures for Suzuki-Miyaura coupling were followed. 1-Chloro-1-cyclopentene (103 mg, 1.0 mmol), phenylboronic acid (183 mg, 1.5 mmol), K3PO4H2O (692 mg, 3.0 mmol), Pd2dba3 (4.6 mg, 0.5 mol%), 2-(diphenylphosphino)phenylferrocene (5.3 mg, 1.2 mol%) and toluene (2 mL) were heated to 110 C for 24 h to obtain 1-(1-cyclopentene-1-yl)benzene(127 mg, 88% yield) as colorless liquid. 1H NMR (500 MHz, CDCl3)  7.30-7.72 (m, 5 H), 6.30 (s 1 H), 2.83 (m, 2 H), 2.64 (m, 2 H), 2.10 (m, 2 H); 13C NMR (125 MHz, CDCl3)  142.4, 136.3, 128.0, 126.9, 125.8, 125.3, 33.2, 33.0, 23.1; MS(EI): m/z (relative intensity) 144 (M+, 100).

**4-(n-Butyl)acetophenone (Table 3, entry 10).** General procedures for Suzuki-Miyaura coupling were followed. 4-Chloroacetophenone (155 mg, 1.0 mmol), n-butylboronic acid (153 mg, 1.5 mmol), K3PO4 (638 mg, 3.0 mmol), Pd2dba3 (4.6 mg, 0.5 mol%), 2-(diphenylphosphino)phenylferrocene (5.3 mg, 1.2 mol%) and toluene (2 mL) were heated to 70 C for 24 h to obtain 4-(n-butyl)acetophenone (167 mg, 95% yield) as light yellow liquid. 1H NMR (500 MHz, CDCl3)  7.87 (d, 2 H, J = 8.0 Hz), 7.26 (d, 2 H, J = 8.0 Hz), 2.67 (t, 2 H, J = 7.5 Hz), 2.58 (s, 3 H), 1.58-1.64 (m, 2 H), 1.33-1.38 (m, 2 H), 0.93 (t, 3 H, J = 7.0 Hz); 13C NMR (125 MHz, CDCl3)  148.7, 134.8, 128.5, 128.4, 35.6, 33.2, 26.5, 22.3, 13.8; IR (cm-1) 2924, 2853, 1690, 1607, 1461, 1379, 1265, 721; MS(EI): m/z (relative intensity) 176 (M+, 100); HRMS(ESI): Calcd. for C12H16O 176.1201, found: 176.1214.

**4-(n-Butyl)benzonitrile (Table 3, entry 11).***[[15]](#endnote-15)*General procedures for Suzuki-Miyaura coupling were followed. 4-Chlorobenzonitrile (138 mg, 1.0 mmol), n-butylboronic acid (153 mg, 1.5 mmol), K3PO4 (638 mg, 3.0 mmol), Pd2dba3 (4.6 mg, 0.5 mol%), 2-(diphenylphosphino)phenylferrocene (5.3 mg, 1.2 mol%) and toluene (2 mL) were heated to 70 C for 24 h to obtain 4-(n-butyl)benzonitrile (148 mg, 93% yield) as colorless oil. 1H NMR (500 MHz, CDCl3)  7.27 (d, 2 H, J = 8.0 Hz), 7.56 (d, 2 H, J = 8.0 Hz), 2.66 (t, 2 H, J = 7.5 Hz), 1.60 (m, 2 H), 1.35 (m, 2 H), 0.95 (t, 3 H, J = 7.5 Hz); 13C NMR (125 MHz, CDCl3)  148.5, 131.8, 129.0, 119.1, 109.3, 35.6, 33.0, 22.5, 13.8; MS(EI): m/z (relative intensity) 159 (M+, 60), 117 (100).

**References:**

1.  University Grants Committee, Area of Excellence Scheme, Hong Kong. [↑](#footnote-ref-2)
2. (?) Armarego, W. L. F.; Perrin, D. D. *Purification of Laboratory Chemicals*, 4th Ed. 1996, Butterworth-Heinemann: Oxford UK. [↑](#endnote-ref-2)
3. (?) Zhang, H. C.; Kwong, F. Y.; Tian, Y.; Chan, K. S. *J. Org. Chem*. **1998,** *63*, 6886-6890. [↑](#endnote-ref-3)
4. (?) Becht, J.-M.; Gissot, A.; Wagner, A.; Mioskowski, C. *Chem. Eur. J*. **2003**, *9*, 3209-3215. [↑](#endnote-ref-4)
5. (?) Oh, C. H.; Lim, Y. M. *Bull. Korean. Chem. Soc*. **2002**, *23*, 663-664. [↑](#endnote-ref-5)
6. (?) Wolf, C.; Lerebours, R. *J. Org. Chem*. **2003**, *68*, 7551-7554. [↑](#endnote-ref-6)
7. (?) Kataoka, N.; Shelby, Q.; Stambuli, J. P.; Hartwig, J. F. *J. Org. Chem*. **2002**, *67*, 5553-5566. [↑](#endnote-ref-7)
8. (?) Molander, G. A.; Biolatto, B. *Org. Lett*. **2002**, *4*, 1867-1870. [↑](#endnote-ref-8)
9. (?) Barba, I.; Chinchilla, R.; Gomez, C. *Tetrahedron* **1990**, *46*, 7813-7822. [↑](#endnote-ref-9)
10. (?) Hatanaka, Y.; Goda, K.; Okahara, Y.; Hiyama, T. *Tetrahedron* **1994**, *50*, 8301-8316. [↑](#endnote-ref-10)
11. (?) Wolfe, J. P.; Buchwald, S. L. *Angew. Chem. Int. Ed*. **1999**, *38*, 2413-2416. [↑](#endnote-ref-11)
12. (?) Riguet, E.; Alami, M.; Cahiez, G. *J. Organomet. Chem*. **2001**, *624*, 376-379. [↑](#endnote-ref-12)
13. (?) Nguyen, H. N.; Huang, X.; Buchwald, S. L. *J. Am. Chem. Soc*. **2003**, *125*, 11818-11819. [↑](#endnote-ref-13)
14. (?) Li, G. Y. *J. Org. Chem*. **2002**, *67*, 3643-3650. [↑](#endnote-ref-14)
15. (?) Kyushin, S.; Masuda, Y.; Matsushita, K.; Nakadaira, Y.; Ohashi, M. *Tetrahedron Lett*. **1990**, *31*, 6395-6398. [↑](#endnote-ref-15)
